# Supplementary material
Source: PubMed Central journal article supplement (PMC3819203)
Supplement: NIHMS521820-supplement-01.pdf [file NIHMS521820-supplement-01.pdf]

**Supplemental Table 1: Reported Virus-ESCRT Interactions**

| Virus                                              | Viral Protein | Late Assembly Domain                | Early-Acting ESCRT Factor                      | References                         |
|----------------------------------------------------|---------------|-------------------------------------|------------------------------------------------|------------------------------------|
| <b>Enveloped Viruses</b>                           |               |                                     |                                                |                                    |
| <b>RNA Viruses</b>                                 |               |                                     |                                                |                                    |
| <i>Retroviruses</i>                                |               |                                     |                                                |                                    |
| <b>Human Immunodeficiency virus Type 1 (HIV-1)</b> | Gag           | P(T/S)AP<br>YPXL<br>unknown         | TSG101<br>ALIX<br>NEDD4L                       | [15,19,25,28,30,39,59,82,92,93,95] |
| <b>Simian Immunodeficiency Virus (and HIV-2)</b>   | Gag           | P(T/S)AP<br>YPXL                    | TSG101<br>ALIX                                 | [5,6,61,82,110]                    |
| <b>Feline Immunodeficiency Virus</b>               | Gag           | P(T/S)AP<br>unknown                 | TSG101<br>NEDD4L                               | [9,57]                             |
| <b>Equine Infectious Anemia Virus (EIAV)</b>       | Gag           | YPXL                                | ALIX                                           | [13,53,67,68,75,82,109]            |
| <b>Human T Cell Leukemia Virus</b>                 | Gag           | P(T/S)AP<br>PPXY<br>unknown         | TSG101<br>NEDD4<br>ALIX?                       | [8,22,35,36,51,91,96]              |
| <b>Prototypic Foamy Virus</b>                      | Gag           | P(T/S)AP<br>PPXY?                   | TSG101<br>NEDD4 family member?                 | [63,81,107,108]                    |
| <b>Rous Sarcoma Virus</b>                          | Gag           | PPXY<br>YPXL                        | NEDD4 family<br>ALIX                           | [20,27,47,60,80,94,99,102]         |
| <b>Mason-Pfizer Monkey Virus</b>                   | Gag           | P(T/S)AP<br>PPXY                    | TSG101<br>NEDD4 family                         | [31,103]                           |
| <b>Murine Leukemia Virus (MLV)</b>                 | Gag           | P(T/S)AP<br>YPXL<br>PPXY<br>unknown | TSG101<br>ALIX<br>NEDD4 family<br>NEDD4 family | [44,74,105,106]                    |
| <b>Bovine Leukemia Virus</b>                       | Gag           | PPXY                                | NEDD4 family member?                           | [97]                               |
| <b>Koala Retrovirus</b>                            | Gag           | PPXY<br>P(T/S)AP?                   | NEDD4 family<br>TSG101?                        | [76]                               |

| <i>Filoviruses</i>                              |            |                   |                                   |                         |
|-------------------------------------------------|------------|-------------------|-----------------------------------|-------------------------|
| <b>Ebola Virus</b>                              | VP40       | P(T/S)AP<br>PPXY  | TSG101<br>NEDD4 family            | [33,41,56,59,86,87,104] |
| <b>Marburg Virus</b>                            | NP<br>VP40 | P(T/S)AP<br>PPXY  | TSG101<br>NEDD4 family<br>member? | [21,48,88]              |
| <i>Arenaviruses</i>                             |            |                   |                                   |                         |
| <b>Lymphocytic Choriomeningitis Virus</b>       | Z          | P(T/S)AP<br>PPXY  | TSG101<br>NEDD4 family<br>member? | [66]                    |
| <b>Lassa Fever Virus</b>                        | Z          | P(T/S)AP<br>PPXY  | TSG101<br>NEDD4 family<br>member? | [66,89]                 |
| <b>Mopeia Virus</b>                             | Z          | unknown           | ALIX                              | [77]                    |
| <b>Tacaribe Virus</b>                           | Z          | unknown           | unknown                           | [90]                    |
| <i>Paramyxoviruses</i>                          |            |                   |                                   |                         |
| <b>Human Parainfluenzavirus Type 5 (hPIV-5)</b> | M          | FPIV<br>unknown   | unknown<br>AMOT-L1                | [73]<br>[65]            |
| <b>Human Parainfluenzavirus Type 1</b>          | C          | unknown           | ALIX                              | [7]                     |
| <b>Sendai Virus<sup>1</sup></b>                 | C<br>M     | unknown<br>YPXL   | ALIX<br>ALIX                      | [29,42,43,72]           |
| <b>Mumps Virus</b>                              | unknown    | FPIV              | unknown                           | [54]                    |
| <i>Rhabdoviruses</i>                            |            |                   |                                   |                         |
| <b>Vesicular Stomatitis Virus<sup>2</sup></b>   | M          | PPXY<br>P(T/S)AP? | NEDD4 family<br>TSG101?           | [17,32,34,40,45,50,85]  |
| <b>Rabies Virus</b>                             | M          | PPXY              | NEDD4 family                      | [34,101]                |
| <i>Flaviviruses</i>                             |            |                   |                                   |                         |
| <b>Yellow Fever Virus</b>                       | NS3        | YPXL              | ALIX                              | [11]                    |
| <b>Dengue Fever Virus<sup>2</sup></b>           | unknown    | unknown           | ALIX                              | [62]                    |
| <b>Hepatitis C Virus<sup>4</sup></b>            | unknown    | unknown           | unknown                           | [1,16,23,69,83]         |
| <b>Japanese Encephalitis Virus</b>              | NS3        | unknown           | TSG101                            | [14]                    |

---

**DNA Viruses**

---

***Herpesviruses***

|                                          |         |                 |                |            |
|------------------------------------------|---------|-----------------|----------------|------------|
| <b>Herpes Simples Virus</b>              | unknown | unknown         | unknown        | [10,18,64] |
| <b>Epstein-Barr Virus</b>                | BFRF    | unknown         | ALIX           | [52,71]    |
| <b>Human Cytomegalovirus<sup>1</sup></b> | unknown | unknown         | unknown        | [26,84]    |
| <b>Vaccinia virus</b>                    | F13L    | YPXL<br>unknown | ALIX<br>TSG101 | [38]       |

---

***Hepadnaviruses***

|                                      |                 |                            |                                                     |                    |
|--------------------------------------|-----------------|----------------------------|-----------------------------------------------------|--------------------|
| <b>Hepatitis B Virus<sup>1</sup></b> | Core<br>unknown | PPXY<br>unknown<br>unknown | NEDD4 family<br>TSG101<br>ALIX<br>$\alpha$ -Taxilin | [4,37,46,49,70,98] |
|--------------------------------------|-----------------|----------------------------|-----------------------------------------------------|--------------------|

---

**Non-enveloped Viruses**

---

**RNA Viruses**

---

***Reoviruses***

|                                     |          |                  |                                   |          |
|-------------------------------------|----------|------------------|-----------------------------------|----------|
| <b>Bluetongue Virus<sup>3</sup></b> | NS3/NS3A | P(T/S)AP<br>PPXY | TSG101<br>NEDD4 family<br>member? | [12,100] |
| <b>Rotavirus<sup>2</sup></b>        | unknown  | unknown          | unknown                           | [78]     |

---

***Picornaviruses***

|                                      |         |         |      |      |
|--------------------------------------|---------|---------|------|------|
| <b>Hepatitis A Virus<sup>3</sup></b> | unknown | unknown | ALIX | [24] |
|--------------------------------------|---------|---------|------|------|

---

**Insect Viruses**

---

***Baculoviruses***

---

|                                                                                        |         |         |         |      |
|----------------------------------------------------------------------------------------|---------|---------|---------|------|
| <b><i>Autographa californica</i><br/>Multiple<br/>Nucleopolyhedrovirus<sup>2</sup></b> | unknown | unknown | unknown | [55] |
|----------------------------------------------------------------------------------------|---------|---------|---------|------|

#### Archaeal Viruses

|                                                         |         |         |         |         |
|---------------------------------------------------------|---------|---------|---------|---------|
| <b><i>Sulfolobus</i> Turreted<br/>Icosahedral Virus</b> | unknown | unknown | unknown | [58,79] |
|---------------------------------------------------------|---------|---------|---------|---------|

#### Plant Viruses

##### ***Tombusviruses***

|                                 |     |         |                |       |
|---------------------------------|-----|---------|----------------|-------|
| <b>Tomato Bushy Stunt Virus</b> | p33 | unknown | TSG101<br>ALIX | [2,3] |
|---------------------------------|-----|---------|----------------|-------|

<sup>1</sup>Cases in which other studies have failed to confirm ESCRT involvement

<sup>2</sup>Cases in which ESCRT factors are (also) implicated in virus entry

<sup>3</sup>Non-enveloped viruses that can also be released as enveloped particles via ESCRT-dependent budding

<sup>4</sup>Case in which ESCRT pathway is also involved in RNA trafficking

#### **Table References**

[1] Ariumi, Y., Kuroki, M., Maki, M., Ikeda, M., Dansako, H., Wakita, T., and Kato, N. (2011). The ESCRT system is required for hepatitis C virus production. *PLoS one* 6, e14517.

[2] Barajas, D., Jiang, Y., and Nagy, P.D. (2009). A unique role for the host ESCRT proteins in replication of Tomato bushy stunt virus. *PLoS pathogens* 5, e1000705.

[3] Barajas, D., and Nagy, P.D. (2010). Ubiquitination of tombusvirus p33 replication protein plays a role in virus replication and binding to the host Vps23p ESCRT protein. *Virology* 397, 358-368.

[4] Bardens, A., Doring, T., Stieler, J., and Prange, R. (2011). Alix regulates egress of hepatitis B virus naked capsid particles in an ESCRT-independent manner. *Cellular microbiology* 13, 602-619.

[5] Bello, N.F., Wu, F., Sette, P., Dussupt, V., Hirsch, V.M., and Bouamr, F. (2011). Distal leucines are key functional determinants of Alix-binding simian immunodeficiency virus SIV(smE543) and SIV(mac239) type 3 L domains. *J Virol* 85, 11532-11537.

[6] Bibollet-Ruche, F., Bailes, E., Gao, F., Pourrut, X., Barlow, K.L., Clewley, J.P., Mwenda, J.M., Langat, D.K., Chege, G.K., McClure, H.M., *et al.* (2004). New simian immunodeficiency virus infecting De Brazza's monkeys (*Cercopithecus neglectus*): evidence for a cercopithecus monkey virus clade. *J Virol* 78, 7748-7762.

- [7] Boonyaratanakornkit, J., Schomacker, H., Collins, P., and Schmidt, A. (2013). Alix Serves as an Adaptor That Allows Human Parainfluenza Virus Type 1 to Interact with the Host Cell ESCRT System. *PLoS One* *8*, e59462.
- [8] Bouamr, F., Melillo, J.A., Wang, M.Q., Nagashima, K., de Los Santos, M., Rein, A., and Goff, S.P. (2003). PPPYVEPTAP motif is the late domain of human T-cell leukemia virus type 1 Gag and mediates its functional interaction with cellular proteins Nedd4 and Tsg101 [corrected]. *J Virol* *77*, 11882-11895.
- [9] Calistri, A., Del Vecchio, C., Salata, C., Celestino, M., Celegato, M., Gottlinger, H., Palu, G., and Parolin, C. (2009). Role of the feline immunodeficiency virus L-domain in the presence or absence of Gag processing: involvement of ubiquitin and Nedd4-2s ligase in viral egress. *J Cell Physiol* *218*, 175-182.
- [10] Calistri, A., Sette, P., Salata, C., Cancellotti, E., Forghieri, C., Comin, A., Gottlinger, H., Campadelli-Fiume, G., Palu, G., and Parolin, C. (2007). Intracellular trafficking and maturation of herpes simplex virus type 1 gB and virus egress require functional biogenesis of multivesicular bodies. *J Virol* *81*, 11468-11478.
- [11] Carpp, L.N., Galler, R., and Bonaldo, M.C. (2011). Interaction between the yellow fever virus nonstructural protein NS3 and the host protein Alix contributes to the release of infectious particles. *Microbes and infection / Institut Pasteur* *13*, 85-95.
- [12] Celma, C.C., and Roy, P. (2009). A viral nonstructural protein regulates bluetongue virus trafficking and release. *Journal of virology* *83*, 6806-6816.
- [13] Chen, C., Vincent, O., Jin, J., Weisz, O.A., and Montelaro, R.C. (2005). Functions of early (AP-2) and late (AIP1/ALIX) endocytic proteins in equine infectious anemia virus budding. *J Biol Chem* *280*, 40474-40480.
- [14] Chiou, C.T., Hu, C.C., Chen, P.H., Liao, C.L., Lin, Y.L., and Wang, J.J. (2003). Association of Japanese encephalitis virus NS3 protein with microtubules and tumour susceptibility gene 101 (TSG101) protein. *J Gen Virol* *84*, 2795-2805.
- [15] Chung, H.Y., Morita, E., von Schwedler, U., Muller, B., Krausslich, H.G., and Sundquist, W.I. (2008). NEDD4L overexpression rescues the release and infectivity of human immunodeficiency virus type 1 constructs lacking PTAP and YPXL late domains. *J Virol* *82*, 4884-4897.
- [16] Corless, L., Crump, C.M., Griffin, S.D., and Harris, M. (2010). Vps4 and the ESCRT-III complex are required for the release of infectious hepatitis C virus particles. *The Journal of general virology* *91*, 362-372.
- [17] Craven, R.C., Harty, R.N., Paragas, J., Palese, P., and Wills, J.W. (1999). Late domain function identified in the vesicular stomatitis virus M protein by use of rhabdovirus-retrovirus chimeras. *J Virol* *73*, 3359-3365.

- [18] Crump, C.M., Yates, C., and Minson, T. (2007). Herpes simplex virus type 1 cytoplasmic envelopment requires functional Vps4. *J Virol* *81*, 7380-7387.
- [19] Demirov, D.G., Ono, A., Orenstein, J.M., and Freed, E.O. (2002). Overexpression of the N-terminal domain of TSG101 inhibits HIV-1 budding by blocking late domain function. *Proc Natl Acad Sci USA* *99*, 955-960.
- [20] Dilley, K.A., Gregory, D., Johnson, M.C., and Vogt, V.M. (2010). An LYP5L late domain in the gag protein contributes to the efficient release and replication of Rous sarcoma virus. *J Virol* *84*, 6276-6287.
- [21] Dolnik, O., Kolesnikova, L., Stevermann, L., and Becker, S. (2010). Tsg101 is recruited by a late domain of the nucleocapsid protein to support budding of Marburg virus-like particles. *J Virol* *84*, 7847-7856.
- [22] Dorweiler, I.J., Ruone, S.J., Wang, H., Burry, R.W., and Mansky, L.M. (2006). Role of the human T-cell leukemia virus type 1 PTAP motif in Gag targeting and particle release. *J Virol* *80*, 3634-3643.
- [23] Dreux, M., Garaigorta, U., Boyd, B., Decembre, E., Chung, J., Whitten-Bauer, C., Wieland, S., and Chisari, F.V. (2012). Short-range exosomal transfer of viral RNA from infected cells to plasmacytoid dendritic cells triggers innate immunity. *Cell Host Microbe* *12*, 558-570.
- [24] Feng, Z., Hensley, L., McKnight, K.L., Hu, F., Madden, V., Ping, L., Jeong, S.H., Walker, C., Lanford, R.E., and Lemon, S.M. (2013). A pathogenic picornavirus acquires an envelope by hijacking cellular membranes. *Nature* *496*, 367-371.
- [25] Fisher, R.D., Chung, H.Y., Zhai, Q., Robinson, H., Sundquist, W.I., and Hill, C.P. (2007). Structural and biochemical studies of ALIX/AIP1 and its role in retrovirus budding. *Cell* *128*, 841-852.
- [26] Fraile-Ramos, A., Pelchen-Matthews, A., Risco, C., Rejas, M.T., Emery, V.C., Hassan-Walker, A.F., Esteban, M., and Marsh, M. (2007). The ESCRT machinery is not required for human cytomegalovirus envelopment. *Cellular microbiology* *9*, 2955-2967.
- [27] Garnier, L., Wills, J.W., Verderame, M.F., and Sudol, M. (1996). WW domains and retrovirus budding. *Nature* *381*, 744-745.
- [28] Garrus, J.E., von Schwedler, U.K., Pornillos, O.W., Morham, S.G., Zavitz, K.H., Wang, H.E., Wettstein, D.A., Stray, K.M., Cote, M., Rich, R.L., *et al.* (2001). Tsg101 and the vacuolar protein sorting pathway are essential for HIV-1 budding. *Cell* *107*, 55-65.
- [29] Gosselin-Grenet, A.S., Marq, J.B., Abrami, L., Garcin, D., and Roux, L. (2007). Sendai virus budding in the course of an infection does not require Alix and VPS4A host factors. *Virology* *365*, 101-112.

- [30] Gottlinger, H.G., Dorfman, T., Sodroski, J.G., and Haseltine, W.A. (1991). Effect of mutations affecting the p6 gag protein on human immunodeficiency virus particle release. *Proc Natl Acad Sci USA* *88*, 3195-3199.
- [31] Gottwein, E., Bodem, J., Muller, B., Schmechel, A., Zentgraf, H., and Krausslich, H.G. (2003). The Mason-Pfizer monkey virus PPPY and PSAP motifs both contribute to virus release. *J Virol* *77*, 9474-9485.
- [32] Harty, R.N., Brown, M.E., McGettigan, J.P., Wang, G., Jayakar, H.R., Huibregtse, J.M., Whitt, M.A., and Schnell, M.J. (2001). Rhabdoviruses and the cellular ubiquitin-proteasome system: a budding interaction. *J Virol* *75*, 10623-10629.
- [33] Harty, R.N., Brown, M.E., Wang, G., Huibregtse, J., and Hayes, F.P. (2000). A PPxY motif within the VP40 protein of ebola virus interacts physically and functionally with a ubiquitin ligase: implications for filovirus budding. *Proc Natl Acad Sci USA* *97*, 13871-13876.
- [34] Harty, R.N., Paragas, J., Sudol, M., and Palese, P. (1999). A proline-rich motif within the matrix protein of vesicular stomatitis virus and rabies virus interacts with WW domains of cellular proteins: implications for viral budding. *J Virol* *73*, 2921-2929.
- [35] Heidecker, G., Lloyd, P.A., Fox, K., Nagashima, K., and Derse, D. (2004). Late assembly motifs of human T-cell leukemia virus type 1 and their relative roles in particle release. *J Virol* *78*, 6636-6648.
- [36] Heidecker, G., Lloyd, P.A., Soheilian, F., Nagashima, K., and Derse, D. (2007). The role of WWP1-Gag interaction and Gag ubiquitination in assembly and release of human T-cell leukemia virus type 1. *J Virol* *81*, 9769-9777.
- [37] Hoffmann, J., Boehm, C., Himmelsbach, K., Donnerhak, C., Roettger, H., T, S.W., Ploen, D., and Hildt, E. (2013). Identification of alpha-taxilin as an essential factor for the life cycle of Hepatitis B virus. *Journal of hepatology*, Epublication ahead of print.
- [38] Honeychurch, K.M., Yang, G., Jordan, R., and Hruby, D.E. (2007). The vaccinia virus F13L YPPL motif is required for efficient release of extracellular enveloped virus. *J Virol* *81*, 7310-7315.
- [39] Huang, M., Orenstein, J.M., Martin, M.A., and Freed, E.O. (1995). p6Gag is required for particle production from full-length human immunodeficiency virus type 1 molecular clones expressing protease. *J Virol* *69*, 6810-6818.
- [40] Irie, T., Carnero, E., Okumura, A., Garcia-Sastre, A., and Harty, R.N. (2007). Modifications of the PSAP region of the matrix protein lead to attenuation of vesicular stomatitis virus in vitro and in vivo. *J Gen Virol* *88*, 2559-2567.
- [41] Irie, T., Licata, J.M., and Harty, R.N. (2005). Functional characterization of Ebola virus L-domains using VSV recombinants. *Virology* *336*, 291-298.

- [42] Irie, T., Nagata, N., Yoshida, T., and Sakaguchi, T. (2008). Recruitment of Alix/AIP1 to the plasma membrane by Sendai virus C protein facilitates budding of virus-like particles. *Virology* 371, 108-120.
- [43] Irie, T., Shimazu, Y., Yoshida, T., and Sakaguchi, T. (2007). The YLDL sequence within Sendai virus M protein is critical for budding of virus-like particles and interacts with Alix/AIP1 independently of C protein. *J Virol* 81, 2263-2273.
- [44] Jadwin, J.A., Rudd, V., Sette, P., Challa, S., and Bouamr, F. (2010). Late domain-independent rescue of a release-deficient Moloney murine leukemia virus by the ubiquitin ligase itch. *J Virol* 84, 704-715.
- [45] Jayakar, H.R., Murti, K.G., and Whitt, M.A. (2000). Mutations in the PPPY motif of vesicular stomatitis virus matrix protein reduce virus budding by inhibiting a late step in virion release. *J Virol* 74, 9818-9827.
- [46] Kian Chua, P., Lin, M.H., and Shih, C. (2006). Potent inhibition of human Hepatitis B virus replication by a host factor Vps4. *Virology* 354, 1-6.
- [47] Kikonyogo, A., Bouamr, F., Vana, M.L., Xiang, Y., Aiyar, A., Carter, C., and Leis, J. (2001). Proteins related to the Nedd4 family of ubiquitin protein ligases interact with the L domain of Rous sarcoma virus and are required for gag budding from cells. *Proc Natl Acad Sci USA* 98, 11199-11204.
- [48] Kolesnikova, L., Strecker, T., Morita, E., Zielecki, F., Mittler, E., Crump, C., and Becker, S. (2009). Vacuolar protein sorting pathway contributes to the release of Marburg virus. *J Virol* 83, 2327-2337.
- [49] Lambert, C., Doring, T., and Prange, R. (2007). Hepatitis B virus maturation is sensitive to functional inhibition of ESCRT-III, Vps4, and gamma 2-adaptin. *J Virol* 81, 9050-9060.
- [50] Le Blanc, I., Luyet, P.P., Pons, V., Ferguson, C., Emans, N., Petiot, A., Mayran, N., Demareux, N., Faure, J., Sadoul, R., *et al.* (2005). Endosome-to-cytosol transport of viral nucleocapsids. *Nat Cell Biol* 7, 653-664.
- [51] Le Blanc, I., Prevost, M.C., Dokhelar, M.C., and Rosenberg, A.R. (2002). The PPPY motif of human T-cell leukemia virus type 1 Gag protein is required early in the budding process. *J Virol* 76, 10024-10029.
- [52] Lee, C.P., Liu, P.T., Kung, H.N., Su, M.T., Chua, H.H., Chang, Y.H., Chang, C.W., Tsai, C.H., Liu, F.T., and Chen, M.R. (2012). The ESCRT machinery is recruited by the viral BFRF1 protein to the nucleus-associated membrane for the maturation of Epstein-Barr Virus. *PLoS pathogens* 8, e1002904.
- [53] Li, F., Chen, C., Puffer, B.A., and Montelaro, R.C. (2002). Functional replacement and positional dependence of homologous and heterologous L domains in equine infectious anemia virus replication. *J Virol* 76, 1569-1577.



- [54] Li, M., Schmitt, P.T., Li, Z., McCrory, T.S., He, B., and Schmitt, A.P. (2009). Mumps virus matrix, fusion, and nucleocapsid proteins cooperate for efficient production of virus-like particles. *J Virol* 83, 7261-7272.
- [55] Li, Z., and Blissard, G.W. (2012). Cellular VPS4 is required for efficient entry and egress of budded virions of *Autographa californica* multiple nucleopolyhedrovirus. *Journal of virology* 86, 459-472.
- [56] Licata, J.M., Simpson-Holley, M., Wright, N.T., Han, Z., Paragas, J., and Harty, R.N. (2003). Overlapping motifs (PTAP and PPEY) within the Ebola virus VP40 protein function independently as late budding domains: involvement of host proteins TSG101 and VPS-4. *J Virol* 77, 1812-1819.
- [57] Luttge, B.G., Shehu-Xhilaga, M., Demirov, D.G., Adamson, C.S., Soheilian, F., Nagashima, K., Stephen, A.G., Fisher, R.J., and Freed, E.O. (2008). Molecular characterization of feline immunodeficiency virus budding. *J Virol* 82, 2106-2119.
- [58] Maaty, W.S., Ortmann, A.C., Dlakic, M., Schulstad, K., Hilmer, J.K., Liepold, L., Weidenheft, B., Khayat, R., Douglas, T., Young, M.J., *et al.* (2006). Characterization of the archaeal thermophile *Sulfolobus* turreted icosahedral virus validates an evolutionary link among double-stranded DNA viruses from all domains of life. *J Virol* 80, 7625-7635.
- [59] Martin-Serrano, J., Zang, T., and Bieniasz, P.D. (2001). HIV-1 and Ebola virus encode small peptide motifs that recruit Tsg101 to sites of particle assembly to facilitate egress. *Nat Med* 7, 1313-1319.
- [60] Medina, G., Zhang, Y., Tang, Y., Gottwein, E., Vana, M.L., Bouamr, F., Leis, J., and Carter, C.A. (2005). The functionally exchangeable L domains in RSV and HIV-1 Gag direct particle release through pathways linked by Tsg101. *Traffic* 6, 880-894.
- [61] Myers, E.L., and Allen, J.F. (2002). Tsg101, an inactive homologue of ubiquitin ligase e2, interacts specifically with human immunodeficiency virus type 2 gag polyprotein and results in increased levels of ubiquitinated gag. *J Virol* 76, 11226-11235.
- [62] Pattanakitsakul, S.N., Pounsawai, J., Kanlaya, R., Sinchaikul, S., Chen, S.T., and Thongboonkerd, V. (2010). Association of Alix with late endosomal lysobisphosphatidic acid is important for dengue virus infection in human endothelial cells. *Journal of proteome research* 9, 4640-4648.
- [63] Patton, G.S., Morris, S.A., Chung, W., Bieniasz, P.D., and McClure, M.O. (2005). Identification of domains in gag important for prototypic foamy virus egress. *J Virol* 79, 6392-6399.
- [64] Pawliczek, T., and Crump, C.M. (2009). Herpes simplex virus type 1 production requires a functional ESCRT-III complex but is independent of TSG101 and ALIX expression. *Journal of virology* 83, 11254-11264.
- [65] Pei, Z., Bai, Y., and Schmitt, A.P. (2010). PIV5 M protein interaction with host protein angiomin-like 1. *Virology* 397, 155-166.

- [66] Perez, M., Craven, R.C., and De La Torre, J.C. (2003). The small RING finger protein Z drives arenavirus budding: Implications for antiviral strategies. *Proc Natl Acad Sci USA* *100*, 12978-12983.
- [67] Puffer, B.A., Parent, L.J., Wills, J.W., and Montelaro, R.C. (1997). Equine infectious anemia virus utilizes a YXXL motif within the late assembly domain of the Gag p9 protein. *J Virol* *71*, 6541-6546.
- [68] Puffer, B.A., Watkins, S.C., and Montelaro, R.C. (1998). Equine infectious anemia virus Gag polyprotein late domain specifically recruits cellular AP-2 adapter protein complexes during virion assembly. *J Virol* *72*, 10218-10221.
- [69] Ramakrishnaiah, V., Thumann, C., Fofana, I., Habersetzer, F., Pan, Q., de Ruiter, P.E., Willemsen, R., Demmers, J.A., Stalin Raj, V., Jenster, G., *et al.* (2013). Exosome-mediated transmission of hepatitis C virus between human hepatoma Huh7.5 cells. *Proc Natl Acad Sci USA* *110*, 13109-13113.
- [70] Rost, M., Mann, S., Lambert, C., Doring, T., Thome, N., and Prange, R. (2006). Gamma-adaptin, a novel ubiquitin-interacting adaptor, and Nedd4 ubiquitin ligase control hepatitis B virus maturation. *J Biol Chem* *281*, 29297-29308.
- [71] Ruiss, R., Jochum, S., Wanner, G., Reisbach, G., Hammerschmidt, W., and Zeidler, R. (2011). A virus-like particle-based Epstein-Barr virus vaccine. *Journal of virology* *85*, 13105-13113.
- [72] Sakaguchi, T., Kato, A., Sugahara, F., Shimazu, Y., Inoue, M., Kiyotani, K., Nagai, Y., and Yoshida, T. (2005). AIP1/Alix is a binding partner of Sendai virus C protein and facilitates virus budding. *J Virol* *79*, 8933-8941.
- [73] Schmitt, A.P., Leser, G.P., Morita, E., Sundquist, W.I., and Lamb, R.A. (2005). Evidence for a new viral late-domain core sequence, FPIV, necessary for budding of a paramyxovirus. *J Virol* *79*, 2988-2997.
- [74] Segura-Morales, C., Pescia, C., Chatellard-Cause, C., Sadoul, R., Bertrand, E., and Basyuk, E. (2005). Tsg101 and Alix interact with murine leukemia virus Gag and cooperate with Nedd4 ubiquitin ligases during budding. *J Biol Chem* *280*, 27004-27012.
- [75] Shehu-Xhilaga, M., Ablan, S., Demirov, D.G., Chen, C., Montelaro, R.C., and Freed, E.O. (2004). Late domain-dependent inhibition of equine infectious anemia virus budding. *J Virol* *78*, 724-732.
- [76] Shimode, S., Nakaoka, R., Hoshino, S., Abe, M., Shogen, H., Yasuda, J., and Miyazawa, T. (2013). Identification of cellular factors required for the budding of koala retrovirus. *Microbiology and immunology* *57*, 543-546.
- [77] Shtanko, O., Watanabe, S., Jasenosky, L.D., Watanabe, T., and Kawaoka, Y. (2011). ALIX/AIP1 is required for NP incorporation into Mopeia virus Z-induced virus-like particles. *J Virol* *85*, 3631-3641.

- [78] Silva-Ayala, D., Lopez, T., Gutierrez, M., Perrimon, N., Lopez, S., and Arias, C.F. (2013). Genome-wide RNAi screen reveals a role for the ESCRT complex in rotavirus cell entry. *Proc Natl Acad Sci USA* *110*, 10270-10275.
- [79] Snyder, J.C., Samson, R.Y., Brumfield, S.K., Bell, S.D., and Young, M.J. (2013). Functional interplay between a virus and the ESCRT machinery in Archaea. *Proc Natl Acad Sci USA*.
- [80] Spidel, J.L., Craven, R.C., Wilson, C.B., Patnaik, A., Wang, H., Mansky, L.M., and Wills, J.W. (2004). Lysines close to the Rous sarcoma virus late domain critical for budding. *J Virol* *78*, 10606-10616.
- [81] Stange, A., Mannigel, I., Peters, K., Heinkelein, M., Stanke, N., Cartellieri, M., Gottlinger, H., Rethwilm, A., Zentgraf, H., and Lindemann, D. (2005). Characterization of prototype foamy virus gag late assembly domain motifs and their role in particle egress and infectivity. *J Virol* *79*, 5466-5476.
- [82] Strack, B., Calistri, A., Craig, S., Popova, E., and Gottlinger, H.G. (2003). AIP1/ALIX Is a Binding Partner for HIV-1 p6 and EIAV p9 Functioning in Virus Budding. *Cell* *114*, 689-699.
- [83] Tamai, K., Shiina, M., Tanaka, N., Nakano, T., Yamamoto, A., Kondo, Y., Kakazu, E., Inoue, J., Fukushima, K., Sano, K., *et al.* (2012). Regulation of hepatitis C virus secretion by the Hrs-dependent exosomal pathway. *Virology* *422*, 377-385.
- [84] Tandon, R., AuCoin, D.P., and Mocarski, E.S. (2009). Human cytomegalovirus exploits ESCRT machinery in the process of virion maturation. *Journal of virology* *83*, 10797-10807.
- [85] Taylor, G.M., Hanson, P.I., and Kielian, M. (2007). Ubiquitin depletion and dominant-negative VPS4 inhibit rhabdovirus budding without affecting alphavirus budding. *Journal of virology* *81*, 13631-13639.
- [86] Timmins, J., Schoehn, G., Ricard-Blum, S., Scianimanico, S., Vernet, T., Ruigrok, R.W., and Weissenhorn, W. (2003). Ebola Virus Matrix Protein VP40 Interaction with Human Cellular Factors Tsg101 and Nedd4. *J Mol Biol* *326*, 493-502.
- [87] Timmins, J., Scianimanico, S., Schoehn, G., and Weissenhorn, W. (2001). Vesicular release of ebola virus matrix protein VP40. *Virology* *283*, 1-6.
- [88] Urata, S., Noda, T., Kawaoka, Y., Morikawa, S., Yokosawa, H., and Yasuda, J. (2007). Interaction of Tsg101 with Marburg virus VP40 depends on the PPPY motif, but not the PT/SAP motif as in the case of Ebola virus, and Tsg101 plays a critical role in the budding of Marburg virus-like particles induced by VP40, NP, and GP. *J Virol* *81*, 4895-4899.
- [89] Urata, S., Noda, T., Kawaoka, Y., Yokosawa, H., and Yasuda, J. (2006). Cellular factors required for Lassa virus budding. *J Virol* *80*, 4191-4195.

- [90] Urata, S., Yasuda, J., and de la Torre, J.C. (2009). The z protein of the new world arenavirus tacaribe virus has bona fide budding activity that does not depend on known late domain motifs. *J Virol* *83*, 12651-12655.
- [91] Urata, S., Yokosawa, H., and Yasuda, J. (2007). Regulation of HTLV-1 Gag budding by Vps4A, Vps4B, and AIP1/Alix. *Virol J* *4*, 66.
- [92] Usami, Y., Popov, S., and Gottlinger, H.G. (2007). Potent rescue of human immunodeficiency virus type 1 late domain mutants by ALIX/AIP1 depends on its CHMP4 binding site. *J Virol* *81*, 6614-6622.
- [93] Usami, Y., Popov, S., Popova, E., and Gottlinger, H.G. (2008). Efficient and specific rescue of human immunodeficiency virus type 1 budding defects by a Nedd4-like ubiquitin ligase. *J Virol* *82*, 4898-4907.
- [94] Vana, M.L., Tang, Y., Chen, A., Medina, G., Carter, C., and Leis, J. (2004). Role of Nedd4 and ubiquitination of Rous sarcoma virus Gag in budding of virus-like particles from cells. *J Virol* *78*, 13943-13953.
- [95] VerPlank, L., Bouamr, F., LaGrassa, T.J., Agresta, B., Kikonyogo, A., Leis, J., and Carter, C.A. (2001). Tsg101, a homologue of ubiquitin-conjugating (E2) enzymes, binds the L domain in HIV type 1 Pr55Gag. *Proc Natl Acad Sci USA* *98*, 7724-7729.
- [96] Wang, H., Machesky, N.J., and Mansky, L.M. (2004). Both the PPPY and PTAP motifs are involved in human T-cell leukemia virus type 1 particle release. *J Virol* *78*, 1503-1512.
- [97] Wang, H., Norris, K.M., and Mansky, L.M. (2002). Analysis of bovine leukemia virus gag membrane targeting and late domain function. *J Virol* *76*, 8485-8493.
- [98] Watanabe, T., Sorensen, E.M., Naito, A., Schott, M., Kim, S., and Ahlquist, P. (2007). Involvement of host cellular multivesicular body functions in hepatitis B virus budding. *Proc Natl Acad Sci USA* *104*, 10205-10210.
- [99] Wills, J.W., Cameron, C.E., Wilson, C.B., Xiang, Y., Bennett, R.P., and Leis, J. (1994). An assembly domain of the Rous sarcoma virus Gag protein required late in budding. *J Virol* *68*, 6605-6618.
- [100] Wirblich, C., Bhattacharya, B., and Roy, P. (2006). Nonstructural protein 3 of bluetongue virus assists virus release by recruiting ESCRT-I protein Tsg101. *J Virol* *80*, 460-473.
- [101] Wirblich, C., Tan, G.S., Papaneri, A., Godlewski, P.J., Orenstein, J.M., Harty, R.N., and Schnell, M.J. (2008). PPEY motif within the rabies virus (RV) matrix protein is essential for efficient virion release and RV pathogenicity. *J Virol* *82*, 9730-9738.
- [102] Xiang, Y., Cameron, C.E., Wills, J.W., and Leis, J. (1996). Fine mapping and characterization of the Rous sarcoma virus Pr76gag late assembly domain. *J Virol* *70*, 5695-5700.

- [103] Yasuda, J., and Hunter, E. (1998). A proline-rich motif (PPPY) in the Gag polyprotein of Mason-Pfizer monkey virus plays a maturation-independent role in virion release. *J Virol* 72, 4095-4103.
- [104] Yasuda, J., Nakao, M., Kawaoka, Y., and Shida, H. (2003). Nedd4 regulates egress of Ebola virus-like particles from host cells. *J Virol* 77, 9987-9992.
- [105] Yuan, B., Campbell, S., Bacharach, E., Rein, A., and Goff, S.P. (2000). Infectivity of moloney murine leukemia virus defective in late assembly events is restored by late assembly domains of other retroviruses. *J Virol* 74, 7250-7260.
- [106] Yuan, B., Li, X., and Goff, S.P. (1999). Mutations altering the moloney murine leukemia virus p12 Gag protein affect virion production and early events of the virus life cycle. *Embo J* 18, 4700-4710.
- [107] Zhadina, M., and Bieniasz, P.D. (2010). Functional interchangeability of late domains, late domain cofactors and ubiquitin in viral budding. *PLoS Pathog* 6, e1001153.
- [108] Zhadina, M., McClure, M.O., Johnson, M.C., and Bieniasz, P.D. (2007). Ubiquitin-dependent virus particle budding without viral protein ubiquitination. *Proc Natl Acad Sci USA* 104, 20031-20036.
- [109] Zhai, Q., Fisher, R.D., Chung, H.Y., Myszka, D.G., Sundquist, W.I., and Hill, C.P. (2008). Structural and functional studies of ALIX interactions with YPX(n)L late domains of HIV-1 and EIAV. *Nat Struct Mol Biol* 15, 43-49.
- [110] Zhai, Q., Landesman, M.B., Robinson, H., Sundquist, W.I., and Hill, C.P. (2011). Identification and structural characterization of the ALIX-binding late domains of simian immunodeficiency virus SIVmac239 and SIVagmTan-1. *J Virol* 85, 632-637.
